# Supplementary material
Source: PubMed Central journal article supplement (PMC6509025)
Supplement: NIHMS1506077-supplement-1.pdf [file NIHMS1506077-supplement-1.pdf]

Supplementary Table 1. Longitudinal alpha diversity measures of fecal samples from 32 women with breast cancer participating in a presurgical weight loss trial<sup>a</sup> having low versus high *Akkermansia muciniphila* abundance.

|                                   | Low <i>A. muciniphila</i> (n=16) |       |           |       |                | High <i>A. muciniphila</i> (n=16) |       |           |       |                | p <sup>c</sup> |
|-----------------------------------|----------------------------------|-------|-----------|-------|----------------|-----------------------------------|-------|-----------|-------|----------------|----------------|
|                                   | Baseline                         |       | Follow-up |       | p <sup>b</sup> | Baseline                          |       | Follow-up |       | p <sup>b</sup> |                |
|                                   | Mean                             | SD    | Mean      | SD    |                | Mean                              | SD    | Mean      | SD    |                |                |
| Observed species <sup>d</sup>     | 282.4                            | 69.6  | 303.6     | 73.0  | 0.342          | 360.8                             | 84.8  | 330.8     | 70.9  | 0.054          | 0.058          |
| Chao1 <sup>e</sup>                | 341.6                            | 71.2  | 361.5     | 75.4  | 0.335          | 418.4                             | 90.2  | 379.9     | 75.3  | 0.044          | 0.036          |
| Whole tree phylogeny <sup>f</sup> | 20.7                             | 4.3   | 21.7      | 5.0   | 0.416          | 25.8                              | 5.8   | 24.6      | 4.7   | 0.168          | 0.144          |
| Shannon Index <sup>g</sup>        | 4.735                            | 0.729 | 5.113     | 0.858 | 0.201          | 5.395                             | 0.559 | 4.970     | 0.736 | 0.012          | 0.017          |

<sup>a</sup>Mean time from baseline to follow-up was 30±9 days.

<sup>b</sup>Within group differences from baseline to follow-up

<sup>c</sup>Differences between groups from baseline to follow-up

<sup>d</sup>Observed species: number of unique species observed per sample

<sup>e</sup>Chao1: estimate of species richness including rare species

<sup>f</sup>Whole tree phylogeny: metric of phylogenetic diversity among species

<sup>g</sup>Shannon Index: estimate of species richness

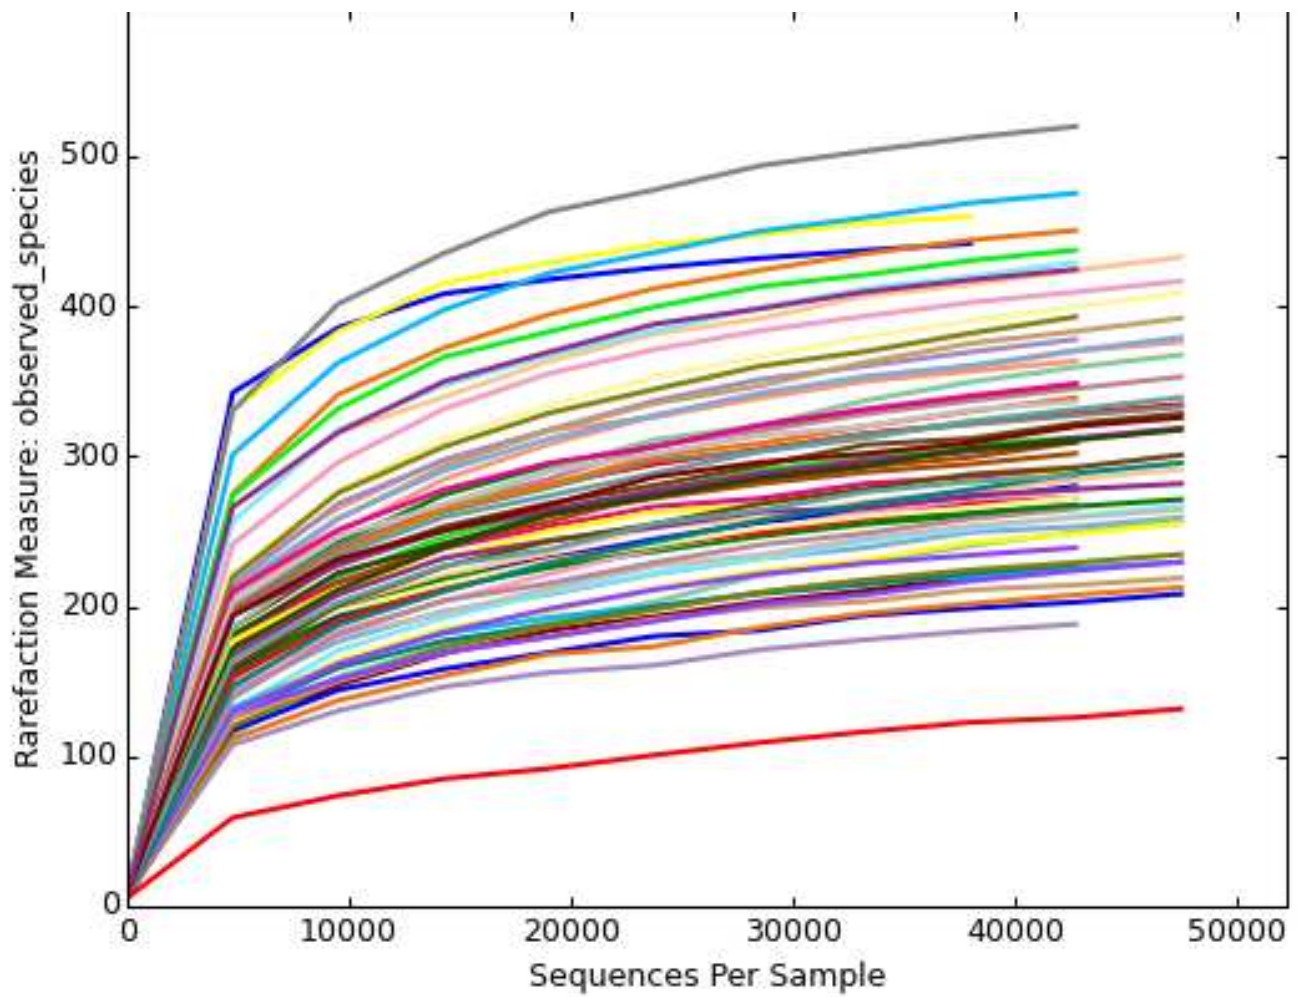

Supplementary Figure 1. Rarefaction curves with number of species observed in each sample as a function of sequences sampled per sample in all fecal samples provided by 32 women with breast cancer participating in a presurgical weight loss trial.

a

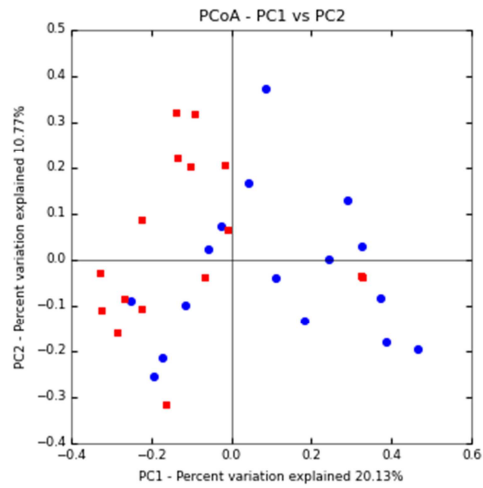

b

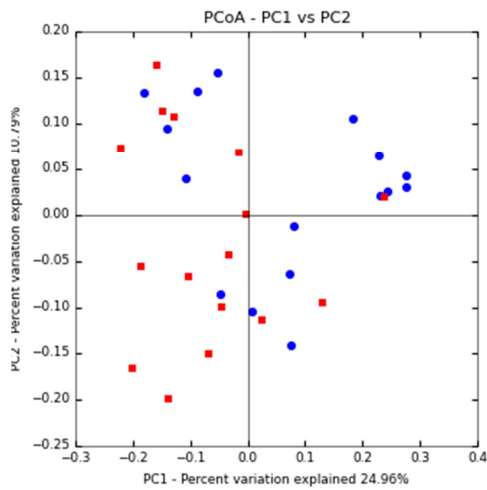

c

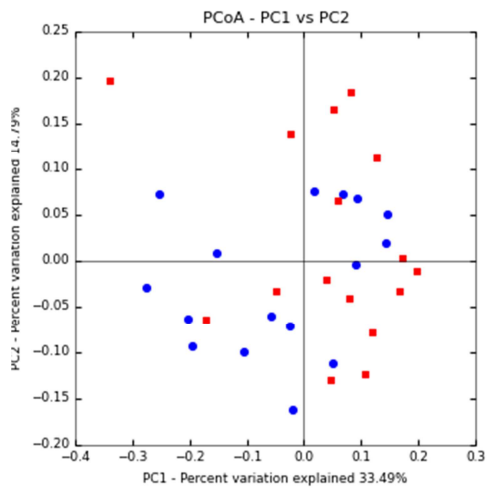

Supplementary Figure 2. Principal coordinate analysis (PCoA) plots of all fecal samples from 32 women with breast cancer participating in a presurgical weight loss trial at baseline. Red squares = LAM; Blue circles = HAM a) Bray-Curtis,  $p = 0.002$ , b) Unweighted Unifrac,  $p = 0.014$ , c) Weighted Unifrac,  $p = 0.028$ .

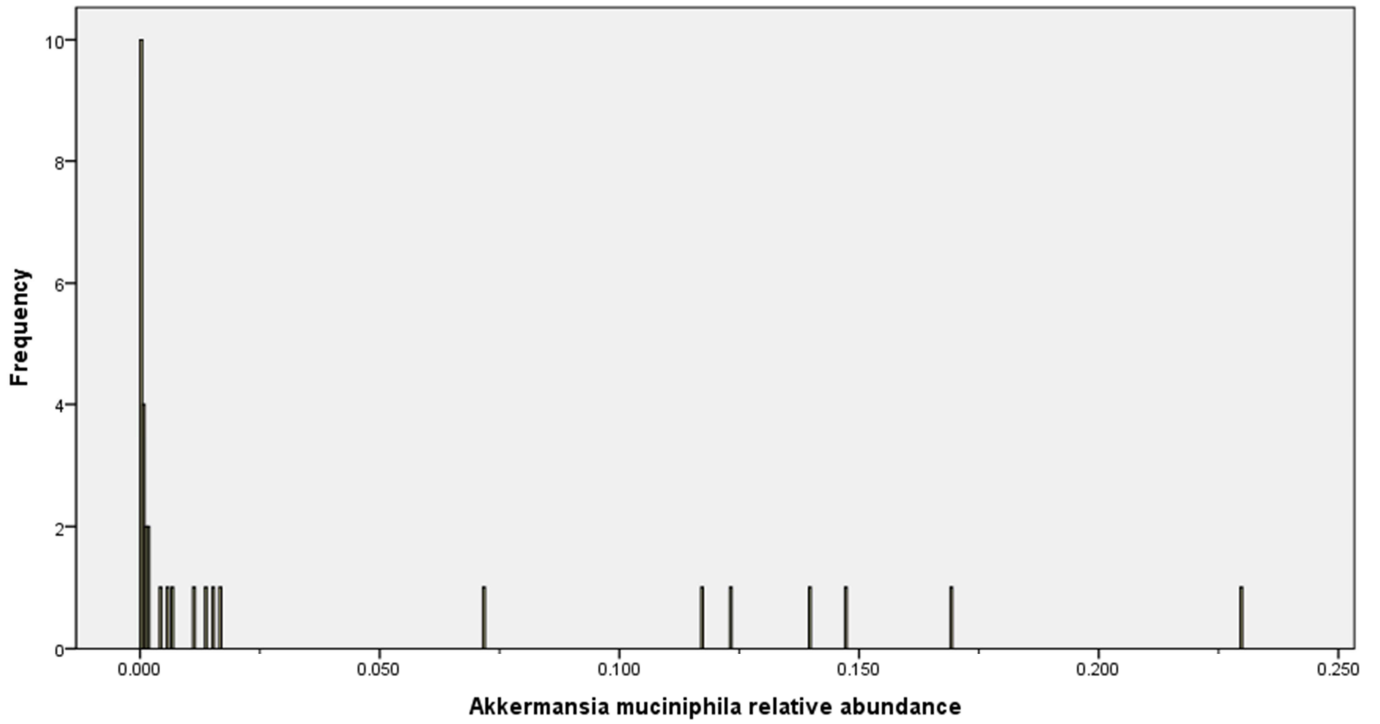

Supplementary Figure 3. Distribution of 32 women with breast cancer participating in a presurgical weight loss trial by relative abundance of *Akkermansia Muciniphila*.
